# Supplementary material
Source: Royal Society of Chemistry journal article supplement (doi:10.1039/d6ta00154h)
Supplement: d6ta00154h1.pdf [file d6ta00154h1.pdf]

## Supplementary Information

# Governing Factors in Mildly Acidic Zn/MnO<sub>2</sub> Batteries: Interplay of Electrochemical Protocols, Electrolyte Composition, and Cell Configuration

Aldina Sultana, Alan Ferris, Colton King, Seongbak Moon,  
and Veronica Augustyn\*

Department of Materials Science and Engineering  
North Carolina State University  
Raleigh, NC 27695 (USA)

\* corresponding author e-mail: [vaugust@ncsu.edu](mailto:vaugust@ncsu.edu)

## Table of Contents

|                                                                                                                                                                                                                                                                                                                                                                                                                                                                                                                                                                                                           |    |
|-----------------------------------------------------------------------------------------------------------------------------------------------------------------------------------------------------------------------------------------------------------------------------------------------------------------------------------------------------------------------------------------------------------------------------------------------------------------------------------------------------------------------------------------------------------------------------------------------------------|----|
| 1. <b>Supplementary Figures</b> .....                                                                                                                                                                                                                                                                                                                                                                                                                                                                                                                                                                     | 4  |
| Figure S1. Schematics of electrochemical cells used in this work: a) three electrode flooded electrolyte beaker cell, b) two electrode flooded electrolyte beaker cell, and c) two electrode Swagelok cell. ....                                                                                                                                                                                                                                                                                                                                                                                          | 4  |
| Figure S2. Optical image of the ex-situ Raman spectroscopy sample setup used to mitigate dehydration of the MnO <sub>2</sub> cathode. ....                                                                                                                                                                                                                                                                                                                                                                                                                                                                | 5  |
| Figure S3. Schematic of the operando electrochemical optical microscopy (EC-OM) setup....                                                                                                                                                                                                                                                                                                                                                                                                                                                                                                                 | 6  |
| Figure S4. Electrochemical cell configuration and electrolyte affect coulombic efficiency of the Zn/MnO <sub>2</sub> two electrode cell: a) Comparison of a Cu foil vs. Zn foil anode in aqueous electrolyte and b) comparison of the same electrodes in a hybrid electrolyte. In both cases, the cathode current collector was graphite foil and the applied current was +/- 0.1 mA/cm <sup>2</sup> ....                                                                                                                                                                                                 | 7  |
| Figure S5. Galvanostatic charge (potential vs. time) profile at 0.05 mA/cm <sup>2</sup> for 3 hours, 5 hours, and 10 hours in the (a) aqueous and (b) hybrid electrolyte. ....                                                                                                                                                                                                                                                                                                                                                                                                                            | 8  |
| Figure S6. Chronoamperometric charge and galvanostatic discharge of initially anode and cathode-free Zn   MnO <sub>2</sub> batteries in (a) aqueous and (b) hybrid electrolytes. Each panel shows, from top to bottom, the applied potential during charge (V), the resulting current during charge (mA), the applied current density (mA/cm <sup>2</sup> ) during discharge, and the resulting potential during discharge (V) as a function of the areal capacity (mAh/cm <sup>2</sup> ). Dashed vertical lines indicate the target charging capacities of 0.01, 0.17, and 0.5 mAh/cm <sup>2</sup> ..... | 9  |
| Figure S7. Long-term cycling of Zn/MnO <sub>2</sub> cells under a fast charging protocol (chronoamperometry at 2.3 V) at (a) charging capacity of 0.01 mAh/cm <sup>2</sup> and (b) charging capacity of 0.17 mAh/cm <sup>2</sup> in aqueous (orange) and hybrid (green) electrolytes. Coulombic efficiency (%) is plotted versus cycle number for 500 cycles.....                                                                                                                                                                                                                                         | 10 |
| Figure S8. Ex situ Raman spectroscopy of pristine graphite foil performed with the water immersion lens, showing graphite peaks at 1579 cm <sup>-1</sup> and 2709 cm <sup>-1</sup> and a broad water peak at 3423 cm <sup>-1</sup> . ....                                                                                                                                                                                                                                                                                                                                                                 | 11 |
| Figure S9. SEM images of (a) pristine graphite foil and (b) graphite felt. ....                                                                                                                                                                                                                                                                                                                                                                                                                                                                                                                           | 12 |
| Figure S10. Cyclic voltammetry of porous graphite felt in a 1 M Na <sub>2</sub> SO <sub>4</sub> aqueous electrolyte at 20 mV/s. Activated carbon served as the counter electrode and the reference electrode was Ag/AgCl in saturated KCl.....                                                                                                                                                                                                                                                                                                                                                            | 13 |
| Figure S11. Laser optical microscopy of electrodeposited MnO <sub>2</sub> films at 0.17 mAh/cm <sup>2</sup> showing surface morphology and topography differences between (a) chronoamperometric deposition at 2.3 V and (b) galvanostatic deposition at 0.05 mA/cm <sup>2</sup> . The 3D surface profiles reveal distinct roughness patterns and height variations (scale bar in μm) that reflect the influence of deposition protocol on surface roughness of electrodeposited MnO <sub>2</sub> . ....                                                                                                  | 13 |

|                                                                                                                                                                                                                                                                                                                                                                                                                                                                                                                                                                                                                                                                                                 |           |
|-------------------------------------------------------------------------------------------------------------------------------------------------------------------------------------------------------------------------------------------------------------------------------------------------------------------------------------------------------------------------------------------------------------------------------------------------------------------------------------------------------------------------------------------------------------------------------------------------------------------------------------------------------------------------------------------------|-----------|
| Figure S12. Chronoamperometric deposition at 2.3 V on graphite foil    Cu foil to a specific capacity at 0.25 mAh/cm <sup>2</sup> followed by (a) discharge at 0.05 mA/cm <sup>2</sup> (b) rest period ~4.8 hours and discharge at 0.05 mA/cm <sup>2</sup> to a cutoff voltage 0.75 V. Potential vs time profile of the (c) chronoamperometric charging at 2.3 V (d) 4.8 hours rest period and (e) discharge at 0.05 mA/cm <sup>2</sup> in aqueous and hybrid electrolyte.....                                                                                                                                                                                                                  | 14        |
| Figure S13. Porous graphite felt substrates deliver enhanced discharge utilization and distinct MnO <sub>2</sub> morphologies. (a) Galvanostatic discharge profiles after chronoamperometric deposition on graphite felt at 0.5 mAh/cm <sup>2</sup> in aqueous and hybrid electrolytes in Swagelok battery configuration (b) Plan-view SEM images of deposited MnO <sub>2</sub> at 0.5 mAh/cm <sup>2</sup> on graphite felt fibers in aqueous and hybrid electrolytes, revealing distinct morphological differences. Cross-sectional SEM images showing MnO <sub>2</sub> penetration depth and conformal coating from electrode edge to center in (c) aqueous and (d) hybrid electrolytes. .... | 15        |
| Figure S14. Galvanostatic discharge profiles after chronoamperometric deposition on Cu foil    graphite felt at (a) 1 mAh/cm <sup>2</sup> , (b) 2 mAh/cm <sup>2</sup> , and (c) 5 mAh/cm <sup>2</sup> in aqueous and hybrid electrolytes (Swagelok cell). ....                                                                                                                                                                                                                                                                                                                                                                                                                                  | 15        |
| Figure S15. (a) Galvanostatic deposition/stripping of MnO <sub>2</sub> on porous substrate in the two-electrode Swagelok cell in aqueous and hybrid electrolyte. (b) Galvanostatic cycling (6 cycles) of Zn-MnO <sub>2</sub> in hybrid electrolytes in Swagelok cell configuration (Cu foil    Graphite felt). ....                                                                                                                                                                                                                                                                                                                                                                             | 16        |
| <b>2. Calculation of the Electrochemical Surface Area (ECSA) of Graphite Felt.....</b>                                                                                                                                                                                                                                                                                                                                                                                                                                                                                                                                                                                                          | <b>17</b> |
| <b>3. Supplementary Tables.....</b>                                                                                                                                                                                                                                                                                                                                                                                                                                                                                                                                                                                                                                                             | <b>18</b> |
| Table S1. Thickness of electrodeposited MnO <sub>2</sub> following galvanostatic charge at 0.05 mA/cm <sup>2</sup> for 10 hours in aqueous and hybrid electrolytes, obtained from cross-sectional SEM. ....                                                                                                                                                                                                                                                                                                                                                                                                                                                                                     | 18        |
| Table S2. Thickness of electrodeposited MnO <sub>2</sub> following chronoamperometric charging at 2.3 V for a total charge of 0.50 mAh/cm <sup>2</sup> in aqueous and hybrid electrolytes, obtained from cross-sectional SEM. ....                                                                                                                                                                                                                                                                                                                                                                                                                                                              | 18        |
| Table S3. Video speed factors for operando electrochemical optical microscopy (normalized to experiment duration). ....                                                                                                                                                                                                                                                                                                                                                                                                                                                                                                                                                                         | 18        |
| Table S4. Surface roughness parameters of electrodeposited MnO <sub>2</sub> at 0.17 mAh/cm <sup>2</sup> (Figure S12) by chronoamperometric deposition at 2.3 V or galvanostatic deposition at 0.05 mA/cm <sup>2</sup> . R <sub>a</sub> is the arithmetical mean roughness and R <sub>q</sub> is the root mean square roughness.....                                                                                                                                                                                                                                                                                                                                                             | 19        |
| <b>4. Supplementary Reference.....</b>                                                                                                                                                                                                                                                                                                                                                                                                                                                                                                                                                                                                                                                          | <b>19</b> |

## 1. Supplementary Figures

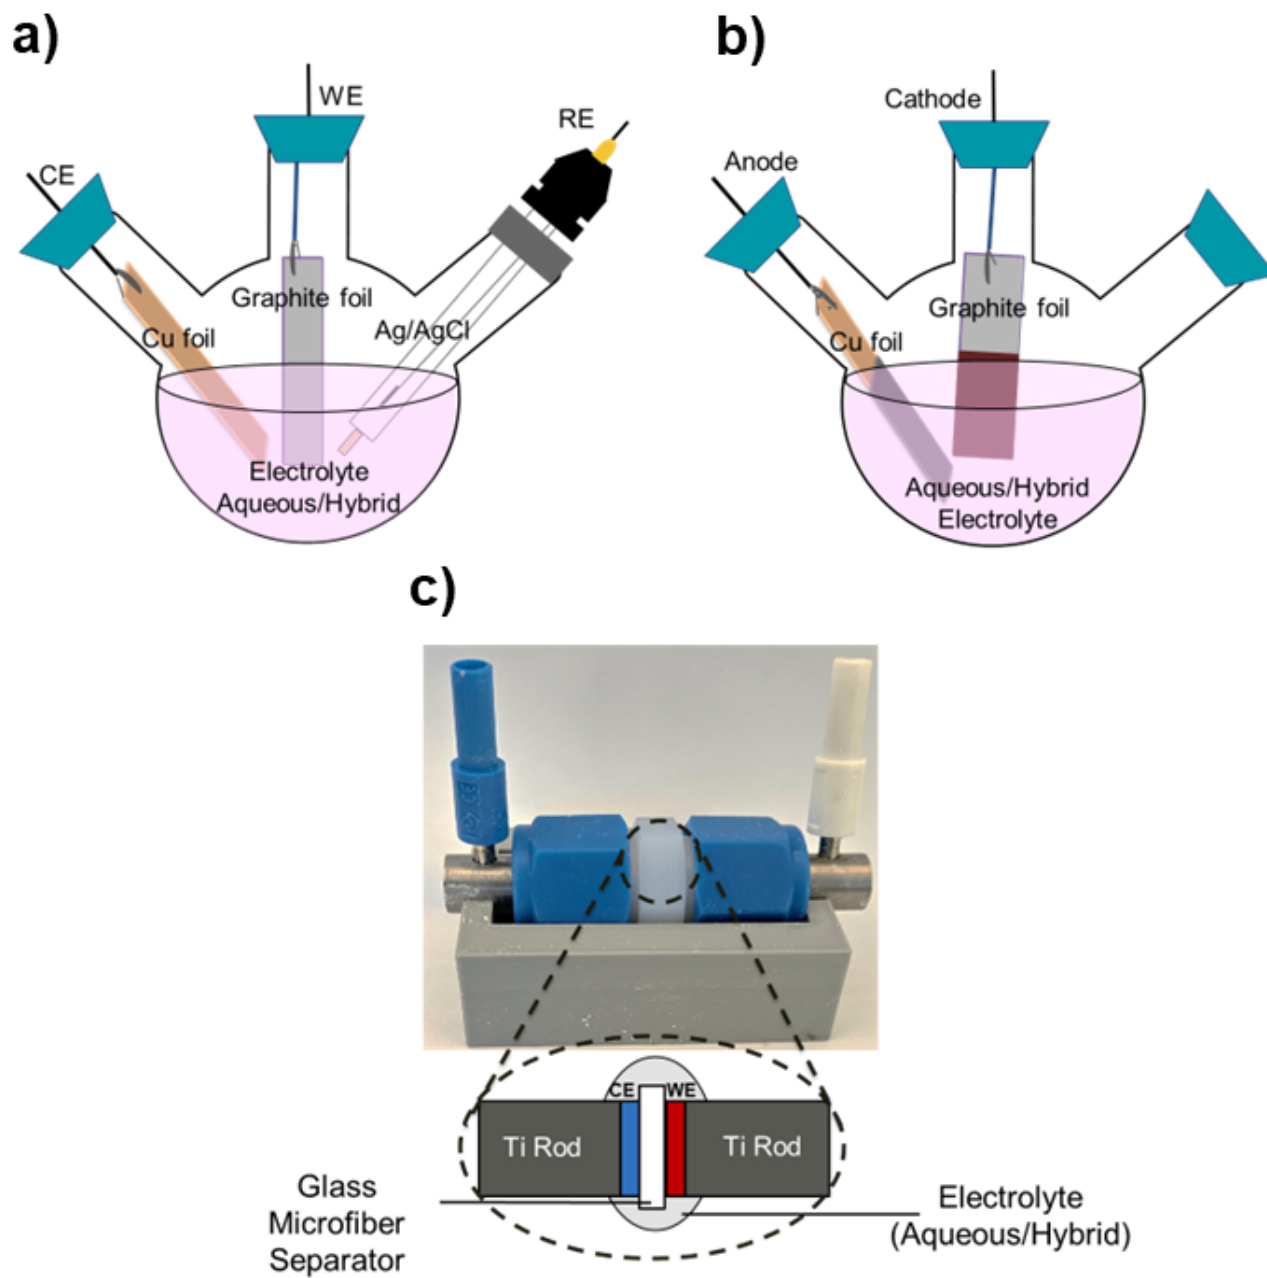

**Figure S1.** Schematics of electrochemical cells used in this work: a) three electrode flooded electrolyte beaker cell, b) two electrode flooded electrolyte beaker cell, and c) two electrode Swagelok cell.

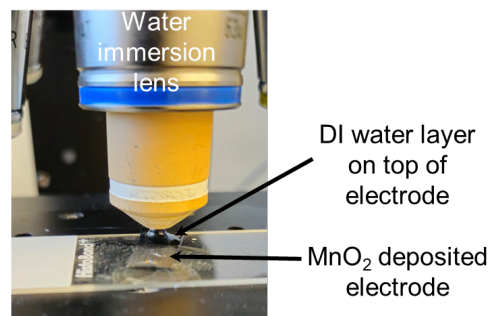

**Figure S2.** Optical image of the ex-situ Raman spectroscopy sample setup used to mitigate dehydration of the MnO<sub>2</sub> cathode.

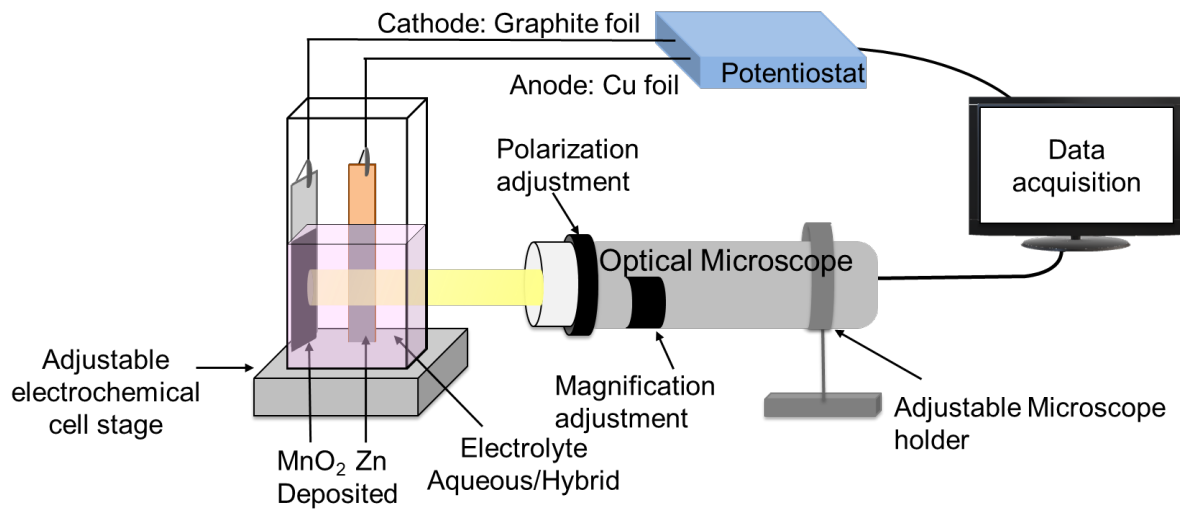

**Figure S3.** Schematic of the operando electrochemical optical microscopy (EC-OM) setup.

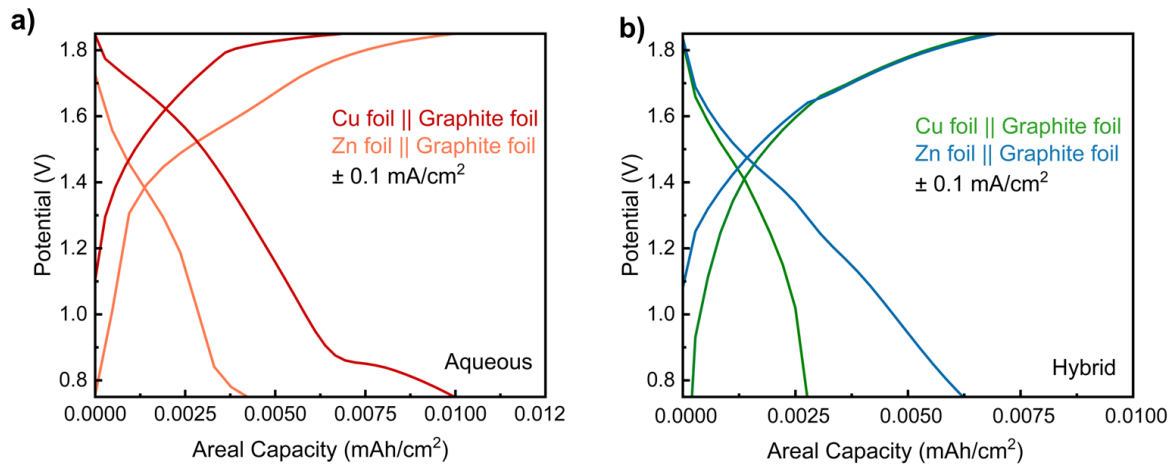

**Figure S4.** Electrochemical cell configuration and electrolyte affect coulombic efficiency of the Zn/MnO<sub>2</sub> two electrode cell: a) Comparison of a Cu foil vs. Zn foil anode in aqueous electrolyte and b) comparison of the same electrodes in a hybrid electrolyte. In both cases, the cathode current collector was graphite foil and the applied current was  $\pm 0.1 \text{ mA/cm}^2$ .

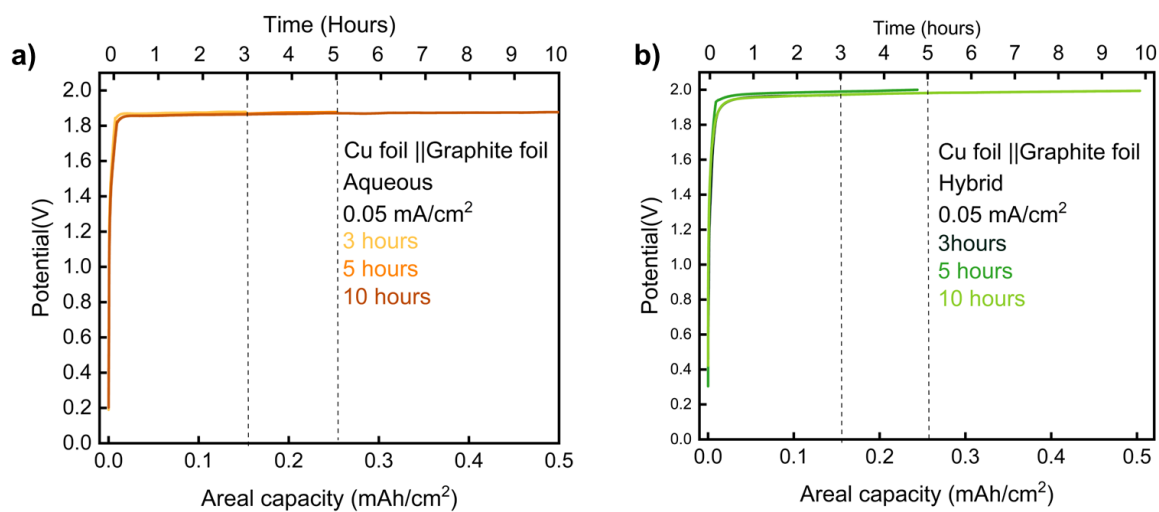

**Figure S5.** Galvanostatic charge (potential vs. time) profile at 0.05 mA/cm<sup>2</sup> for 3 hours, 5 hours, and 10 hours in the (a) aqueous and (b) hybrid electrolyte.

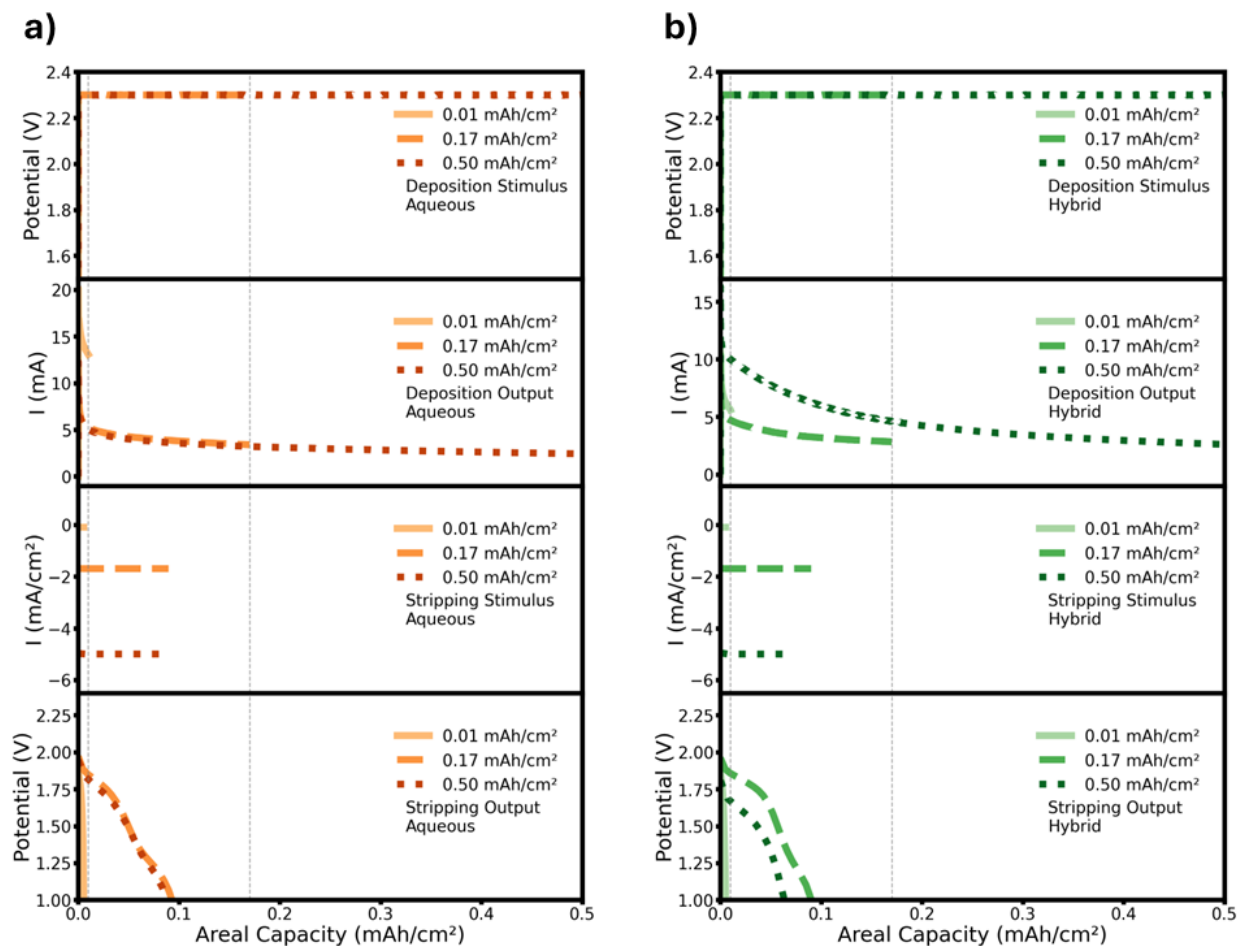

**Figure S6.** Chronoamperometric charge and galvanostatic discharge of initially anode and cathode-free Zn | MnO<sub>2</sub> batteries in (a) aqueous and (b) hybrid electrolytes. Each panel shows, from top to bottom, the applied potential during charge (V), the resulting current during charge (mA), the applied current density (mA/cm<sup>2</sup>) during discharge, and the resulting potential during discharge (V) as a function of the areal capacity (mAh/cm<sup>2</sup>). Dashed vertical lines indicate the target charging capacities of 0.01, 0.17, and 0.5 mAh/cm<sup>2</sup>.

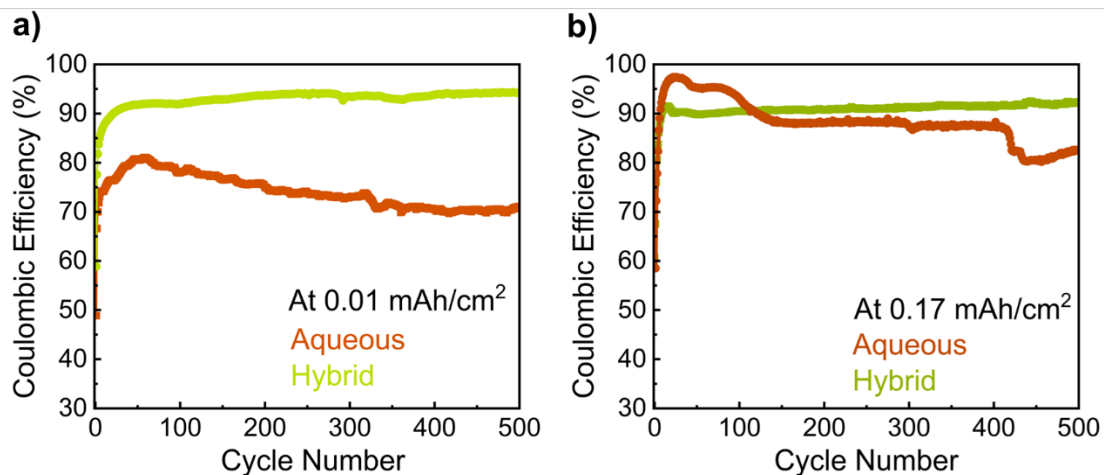

**Figure S7.** Long-term cycling of Zn/MnO<sub>2</sub> cells under a fast charging protocol (chronoamperometry at 2.3 V) at (a) charging capacity of 0.01 mAh/cm<sup>2</sup> and (b) charging capacity of 0.17 mAh/cm<sup>2</sup> in aqueous (orange) and hybrid (green) electrolytes. Coulombic efficiency (%) is plotted versus cycle number for 500 cycles.

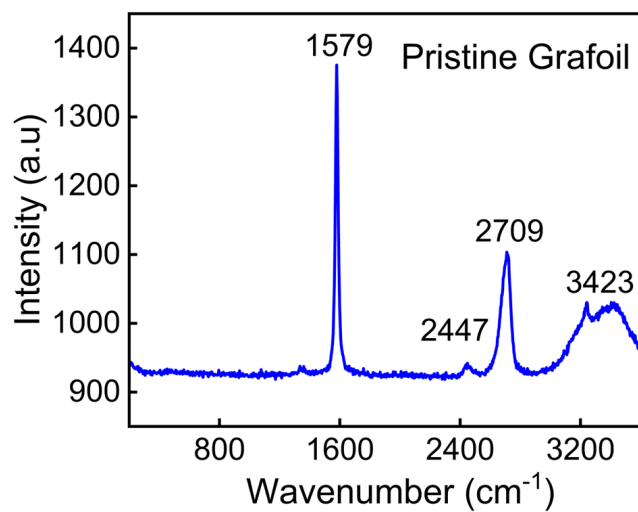

**Figure S8.** Ex situ Raman spectroscopy of pristine graphite foil performed with the water immersion lens, showing graphite peaks at 1579 cm<sup>-1</sup> and 2709 cm<sup>-1</sup> and a broad water peak at 3423 cm<sup>-1</sup>.

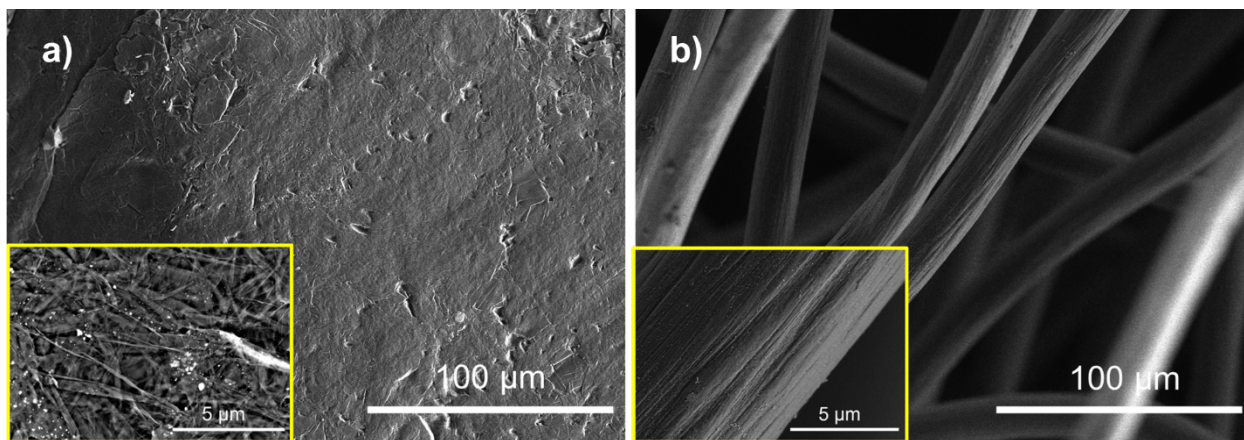

**Figure S9.** SEM images of (a) pristine graphite foil and (b) graphite felt.

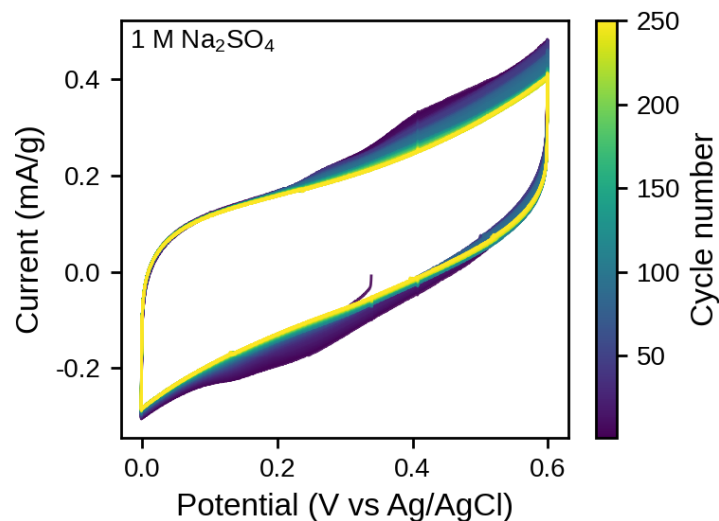

**Figure S10.** Cyclic voltammetry of porous graphite felt in a 1 M  $\text{Na}_2\text{SO}_4$  aqueous electrolyte at 20 mV/s. Activated carbon served as the counter electrode and the reference electrode was Ag/AgCl in saturated KCl.

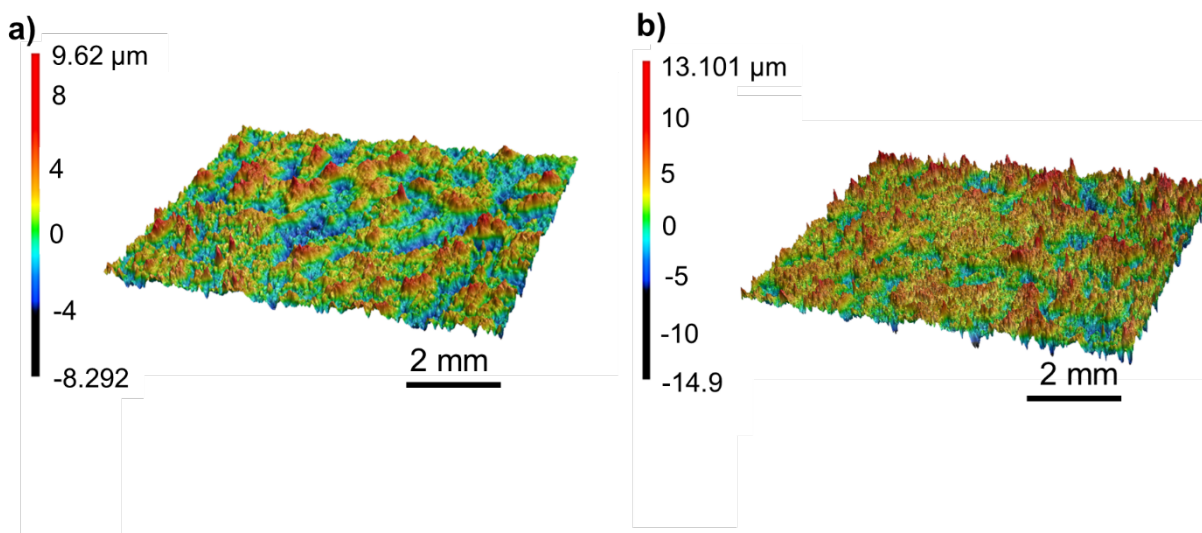

**Figure S11.** Laser optical microscopy of electrodeposited  $\text{MnO}_2$  films at  $0.17 \text{ mAh/cm}^2$  showing surface morphology and topography differences between (a) chronoamperometric deposition at 2.3 V and (b) galvanostatic deposition at  $0.05 \text{ mA/cm}^2$ . The 3D surface profiles reveal distinct roughness patterns and height variations (scale bar in  $\mu\text{m}$ ) that reflect the influence of deposition protocol on surface roughness of electrodeposited  $\text{MnO}_2$ .

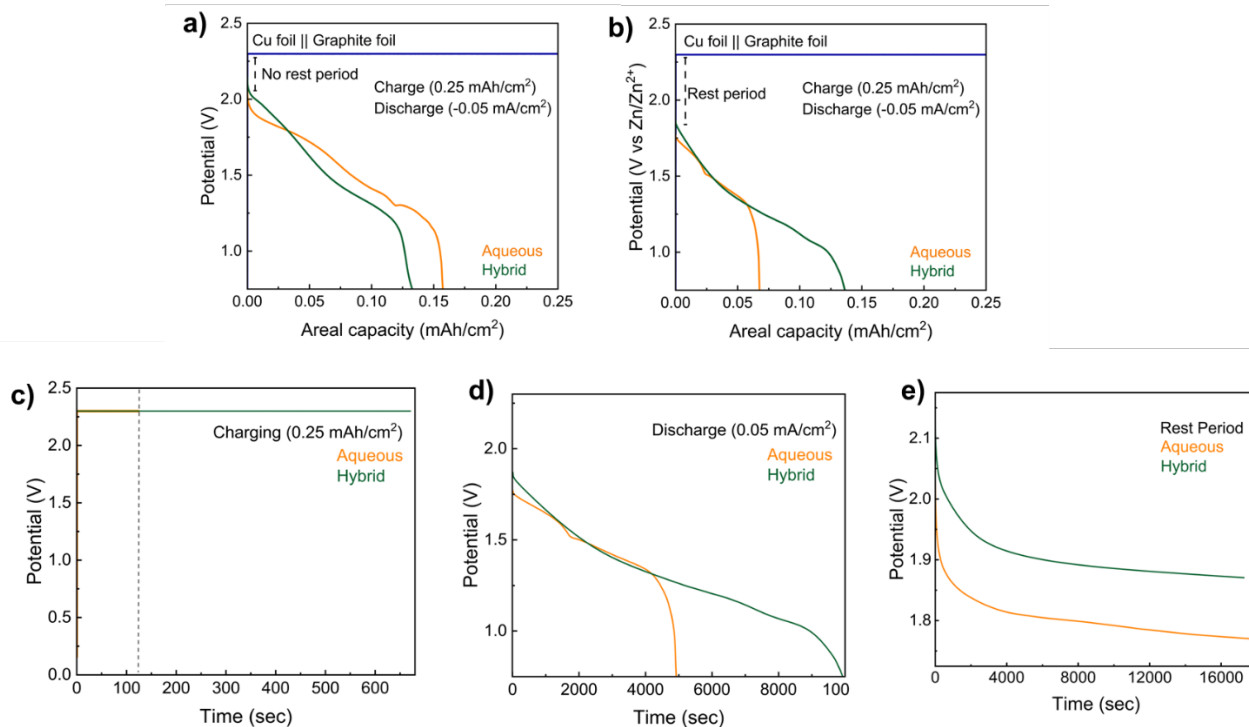

**Figure S12.** Chronoamperometric deposition at 2.3 V on graphite foil || Cu foil to a specific capacity at 0.25 mAh/cm<sup>2</sup> followed by (a) discharge at 0.05 mA/cm<sup>2</sup> (b) rest period ~4.8 hours and discharge at 0.05 mA/cm<sup>2</sup> to a cutoff voltage 0.75 V. Potential vs time profile of the (c) chronoamperometric charging at 2.3 V (d) 4.8 hours rest period and (e) discharge at 0.05 mA/cm<sup>2</sup> in aqueous and hybrid electrolyte.

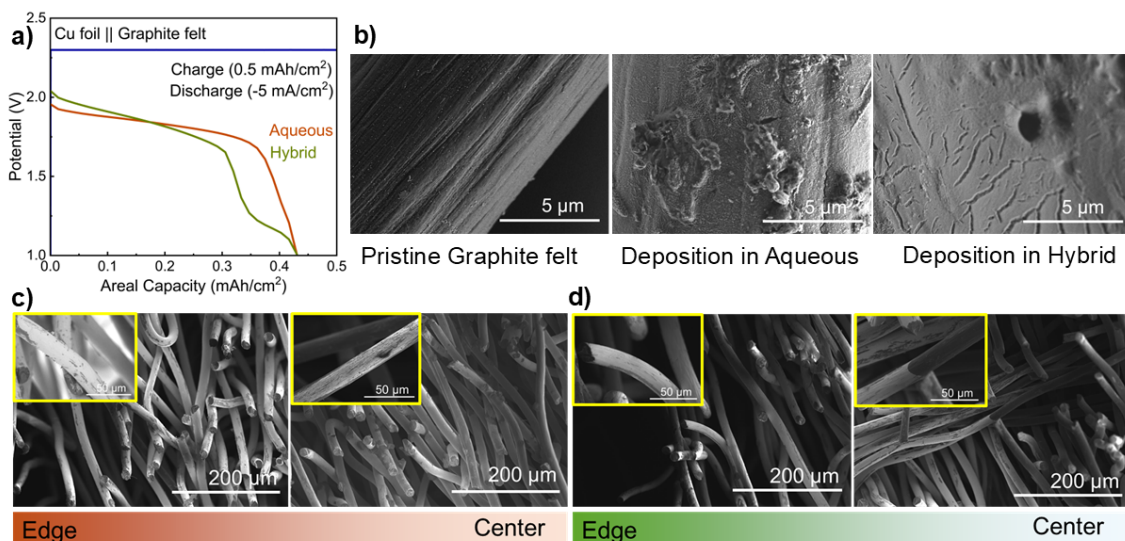

**Figure S13.** Porous graphite felt substrates deliver enhanced discharge utilization and distinct  $\text{MnO}_2$  morphologies. (a) Galvanostatic discharge profiles after chronoamperometric deposition on graphite felt at  $0.5 \text{ mAh/cm}^2$  in aqueous and hybrid electrolytes in Swagelok battery configuration (b) Plan-view SEM images of deposited  $\text{MnO}_2$  at  $0.5 \text{ mAh/cm}^2$  on graphite felt fibers in aqueous and hybrid electrolytes, revealing distinct morphological differences. Cross-sectional SEM images showing  $\text{MnO}_2$  penetration depth and conformal coating from electrode edge to center in (c) aqueous and (d) hybrid electrolytes.

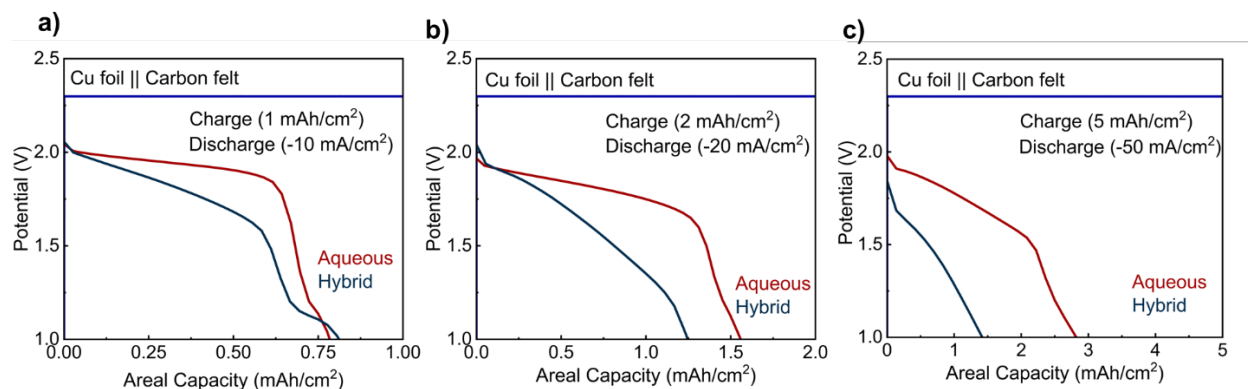

**Figure S14.** Galvanostatic discharge profiles after chronoamperometric deposition on Cu foil || graphite felt at (a)  $1 \text{ mAh/cm}^2$ , (b)  $2 \text{ mAh/cm}^2$ , and (c)  $5 \text{ mAh/cm}^2$  in aqueous and hybrid electrolytes (Swagelok cell).

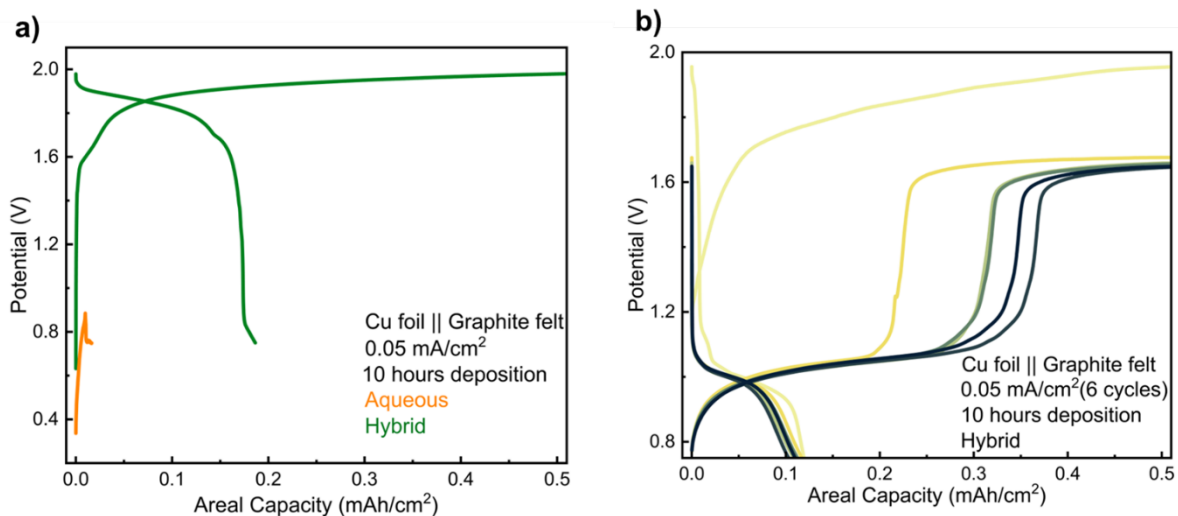

**Figure S15.** (a) Galvanostatic deposition/stripping of MnO<sub>2</sub> on porous substrate in the two-electrode Swagelok cell in aqueous and hybrid electrolyte. (b) Galvanostatic cycling (6 cycles) of Zn-MnO<sub>2</sub> in hybrid electrolytes in Swagelok cell configuration (Cu foil || Graphite felt).

## 2. Calculation of the Electrochemical Surface Area (ECSA) of Graphite Felt

The electrochemical surface area (A) of the porous graphite felt was estimated from the double layer capacitance ( $C_{dl}$ ) of the graphite felt obtained in 1 M  $\text{Na}_2\text{SO}_4$  at 20 mV/s. For 250<sup>th</sup> cycle,  $C_{dl}$  was calculated by taking the integral of the anodic current (I) between two voltages (in this example calculation  $V_1 = 0.25$  V,  $V_2 = 0.45$  V) and dividing by the scan rate ( $v$ ) and voltage window ( $V_2 - V_1$ ):

$$C_{dl} = \frac{\int_{V_1}^{V_2} IdV}{v(V_2 - V_1)} \quad (\text{S1})$$

$$C_{dl} = \frac{1.868 \times 10^{-2} \text{ mC}}{0.004 \text{ V}} \quad (\text{S2})$$

$$C_{dl} = 4.67 \text{ mF} \quad (\text{S3})$$

$$C_{dl} = 4.67 \times 10^{-3} \text{ F} \quad (\text{S4})$$

The porous carbon electrochemical surface area was then determined by assuming a surface-area normalized capacitance for carbon of 40  $\mu\text{F}/\text{cm}^2$ .<sup>1</sup>

$$A = \frac{C_{dl}}{C_s} = 116.77 \text{ cm}^2 \quad (\text{S5})$$

The mass-normalized electrochemical surface area ( $A_M$ ) was then obtained by dividing the electrochemical surface area A by the mass of the carbon scaffold (M):

$$A_M = \frac{A}{M} = \frac{1.1677 \times 10^{-2} \text{ m}^2}{0.625 \text{ g}} = 0.0186 \text{ m}^2/\text{g} \quad (\text{S6})$$

### 3. Supplementary Tables

**Table S1.** Thickness of electrodeposited MnO<sub>2</sub> following galvanostatic charge at 0.05 mA/cm<sup>2</sup> for 10 hours in aqueous and hybrid electrolytes, obtained from cross-sectional SEM.

| Location | Deposition Thickness (μm) |          |
|----------|---------------------------|----------|
|          | (Aqueous)                 | (Hybrid) |
| 1        | 2.158                     | 2.228    |
| 2        | 2.447                     | 2.055    |
| 3        | 2.535                     | 2.019    |
| 4        | 2.254                     | 2.224    |

**Table S2.** Thickness of electrodeposited MnO<sub>2</sub> following chronoamperometric charging at 2.3 V for a total charge of 0.50 mAh/cm<sup>2</sup> in aqueous and hybrid electrolytes, obtained from cross-sectional SEM.

| Location | Deposition Thickness (μm) |          |
|----------|---------------------------|----------|
|          | (Aqueous)                 | (Hybrid) |
| 1        | 2.597                     | 3.985    |
| 2        | 2.482                     | 4.252    |
| 3        | 2.623                     | 4.458    |
| 4        | 2.623                     | 5.512    |

**Table S3.** Video speed factors for operando electrochemical optical microscopy (normalized to experiment duration).

| Plot        | Zinc   |           | MnO <sub>2</sub> |           |
|-------------|--------|-----------|------------------|-----------|
|             | Charge | Discharge | Charge           | Discharge |
| CA+GCD BL   | 26.99x | 23.25x    | 9.29x            | 24.47x    |
| CA+GCD SL   | 52.48x | 15.76x    | 43.03x           | 19.84x    |
| Fast GCD BL | 900x   | 900x      | 900x             | 900x      |
| Fast GCD SL | 900x   | 900x      | 900x             | 900x      |

**Table S4.** Surface roughness parameters of electrodeposited MnO<sub>2</sub> at 0.17 mAh/cm<sup>2</sup> (Figure S11) by chronoamperometric deposition at 2.3 V or galvanostatic deposition at 0.05 mA/cm<sup>2</sup>. R<sub>a</sub> is the arithmetical mean roughness and R<sub>q</sub> is the root mean square roughness.

| Surface Roughness   | Chronoamperometric Deposition | Galvanostatic Deposition |
|---------------------|-------------------------------|--------------------------|
| R <sub>a</sub> (μm) | 2.656 ± 0.196                 | 1.471 ± 0.139            |
| R <sub>q</sub> (μm) | 3.516 ± 0.255                 | 1.965 ± 0.169            |

#### 4. Supplementary Reference

- [1] B. E. Conway, in *Electrochemical Supercapacitors: Scientific Fundamentals and Technological Applications*, ed. B. E. Conway, Springer US, Boston, MA, 1999, pp. 221–257.
